# Supplementary material for: An unknown oxidative metabolism substantially contributes to soil CO 2 emissions
Source: Copernicus journal article supplement (doi:10.5194/bg-10-1155-2013), 2013-02-21
Supplement: Supplementary file 1 [file bg-10-1155-2013-supplement.pdf]

1 **Supporting Online Material for**

2

3 **An unknown respiration pathway substantially contributes to soil**  
4 **CO<sub>2</sub> emissions.**

5

6 Vincent Maire, Gaël Alvarez, Jonathan Colombet, Aurélie Comby, Romain Despinasse, Eric  
7 Dubreucq, Muriel Joly, Anne-Catherine Lehours, Véronique Perrier, Tanvir Shahzad and  
8 Sébastien Fontaine

9

10 To whom correspondence should be addressed: E-mail: [sebastien.fontaine@clermont.inra.fr](mailto:sebastien.fontaine@clermont.inra.fr)

11

12

13 **This file includes:**

14 **S1:** STERILITY OF SOILS, YEAST EXTRACT AND MICROCOSMS.

15 **S2:** GENERALIZATION OF RESPIRATORY ENZYME STABILIZATION IN THE FOUR OTHER STUDIED  
16 SOILS

17 **S3:** KINETIC ACTIVITY OF G6PI IN THE IRRADIATED-SOIL FROM THEIR.

18 **S4:** UNLABELLED AND LABELED CARBON RELEASED AS CO<sub>2</sub> IN WATER AND SOIL MICROCOSMS.

19 **S5:** EFFECT OF THE SECOND GLUCOSE DOSE ON MICROCOSM RESPIRATION.

20 **References**

21

## 22 SUPPLEMENT 1: STERILITY OF SOILS, YEAST EXTRACT AND MICROCOSMS.

23

24 Efficiency of  $\gamma$ -irradiation to kill soil organisms and maintenance of microcosm sterility were  
25 analyzed in detail during the incubation of soil from Theix for 21 days (see the soil incubation  
26 experiment described in section 2.4 of the main text for details). This analysis was based on  
27 combination of complementary microbiological and molecular methods, simulation of  
28 contamination and determination of method sensitivity. Results of this detailed analysis are  
29 presented below in the “Main investigation” section. After efficiency of  $\gamma$ -irradiation and  
30 maintenance of microcosm sterility were verified, we used a simplified approach to control  
31 the absence of contamination for other incubation experiments (Incubation of the four other  
32 studied soils, Yeast-extract incubation described in section 2.2 of the main text). Results of  
33 these investigations are presented in the “Complementary investigations” section. The last  
34 section of this supplementary information on sterility presents methods and sensibility  
35 analysis of TSA FISH.

36

### 37 A. MAIN INVESTIGATION

#### 38 1. Description of experiments

39 Several preliminary tests comparing various methods of sterilization ( $\gamma$ -irradiation, heating  
40 and autoclaving) were carried out (data not shown) before selecting the method presented  
41 here. The  $\gamma$ -irradiation was chosen as sterilizing method for its efficiency to kill soil micro-  
42 organisms and for its moderate effect on soil enzymes. Preservation of soil enzymes was  
43 particularly important to quantify EXOMET. Dose of  $\gamma$ -irradiation used in our experiments to  
44 sterilize soils was 45 kGy. Typically,  $\gamma$ -irradiation at 20 kGy eliminates all cultivable bacteria,  
45 actinomycetes and fungi (McNamara et al., 2003).

46 Here we present results of thorough investigations on efficiency of  $\gamma$ -irradiation to kill  
47 soil micro-organisms and maintenance of sterility of microcosms throughout the incubation  
48 period. These investigations were carried out on irradiated and non-irradiated soils from  
49 Theix incubated for 21 days. Four complementary methods were applied to the soils: i)  
50 Microscopic observations and enumeration of morphological intact cells by transmission  
51 electron microscopy; ii) quantification of microbial biomass; iii) search for the presence of  $\gamma$ -  
52 resistant cultivable microorganisms on three culture media (*e.g.* *Deinococcus radiodurans*,  
53 Warcup, 1950); and iv) count of functional RNA-producing microorganisms in soils by using  
54 fluorescence *in-situ* hybridization (TSA FISH). Moreover, we developed two complementary

55 approaches to quantify the power of our methods to detect a possible contamination of  
56 microcosms. First, the minimum density of living microorganisms detectable by TSA-FISH  
57 method was determined in soil. To understand significance of undetectable cells for soil CO<sub>2</sub>  
58 emission, we calculated the potential contribution of undetectable cells to CO<sub>2</sub> emission from  
59 irradiated-soil by using specific respiration of microorganisms. Second, we experimentally  
60 simulated a contamination of irradiated-soil by inoculating it with diluted soil inoculum. This  
61 inoculum was prepared from the non-irradiated soil from Theix. The microbial biomass  
62 resulting due to inoculation represented 1/1900 of the microbial biomass present in the non-  
63 irradiated-soil.

64

## 65 **2. Results**

66 Irradiation strongly reduced microbial biomass, from 933 in non-irradiated-soil to 247 mg C  
67 kg<sup>-1</sup> in irradiated-soil (Fig. S1-1A). Transmission electron microscopy showed that irradiation  
68 also caused many morphological damages to cells such as membrane disruption and loss of  
69 cell turgescence (Fig. S1-1E). Morphologically intact cells were 16 times lower (Fig S1-1D)  
70 whereas respiration rate was only 1.25 times lower in irradiated-soil as compared to non-  
71 irradiated soil (incubation period 0-2 days, Fig S1-2). Our results also showed that remaining  
72 cells were not viable or functional. Indeed, microbial biomass continuously decreased during  
73 the incubation period reaching undetectable value at day 13 (Fig. S1-1A) indicating that  
74 microbial biomass was lysed. Furthermore, no micro-organism from any culture media was  
75 detected, confirming the absence of cultivable micro-organisms in irradiated-soil (see section  
76 B “Complementary investigations”). Finally, functional RNA-producing cells were not  
77 detected in irradiated-soil irrespective of sampling date whereas  $5.0 \times 10^9$  RNA-producing cells  
78 g<sup>-1</sup> soil were found in non-irradiated living soil (Fig. S1-1B). This showed that cells remaining  
79 after irradiation did not provide RNA and hence respiratory enzymes anymore. Of course, we  
80 cannot exclude the possibility that a few RNA-producing cells remained in irradiated-soil and  
81 were undetected by our methods. However, based on the specific respiratory activity of soil  
82 micro-organisms calculated in the non-irradiated soil (respiration per unit cell, Fig S1-1B and  
83 S1-2 incubation period 0-2 days), respiration measured in irradiated-soil corresponded at least  
84 to an activity of  $4.10^9$  cells g<sup>-1</sup> soil. Given that TSA-FISH method was able to detect the  
85 presence of as low as  $10^5$  cells g<sup>-1</sup> soil (see section C “Methods”), we quantified that the  
86 potential contribution of undetectable cells to CO<sub>2</sub> emission from irradiated-soil cannot  
87 exceed 1/10,000. Consistently, the simulated contamination of irradiated-soil was  
88 immediately detected by the TSA-FISH (Fig. S1-1B). This contamination was followed by a

89 flush of respiration and growth of microorganisms using the soluble C released by the killed  
90 biomass (Figs. S1-1A-C, Fig. S1-2). The growth of microbial contaminants was detected by  
91 all methods (microbial biomass, culture, TSA-FISH).

92

### 93 **3. Conclusions.**

94 Collectively, these results indicate that the  $\gamma$ -irradiation at 45 kGy is highly efficient to kill  
95 soil organisms including the non cultivable micro-organisms. Although some cells can be  
96 observed by electron microscopy in the irradiated-soil, they cannot explain the important CO<sub>2</sub>  
97 emissions measured in the irradiated-soil. Moreover, these cells are not viable and functional  
98 since they cannot grow or produce the RNA required to synthesize proteins and enzymes. We  
99 conclude that the  $\gamma$ -irradiation is an efficient method to stop the living respiration and quantify  
100 the EXOMET using the model presented in the main text.

101 The results also indicate that microcosms could be maintained without microbial  
102 contamination throughout the incubation period. This signifies that methods developed to  
103 maintain microcosms under sterile conditions (manipulation under sterile hood, ventilation of  
104 incubated microcosms with filtered air, etc) were efficient. Finally, in case of microcosm  
105 contamination (simulated), presence of micro-organisms was immediately detected by the  
106 TSA-FISH. Moreover, due to presence of large quantities of labile C in irradiated-soils  
107 (released from the killed soil biomass), growth of microbial contaminants was rapid and  
108 detected by all methods (microbial biomass, microscopy, TSA-FISH, culture, measurement of  
109 flush of CO<sub>2</sub> production).

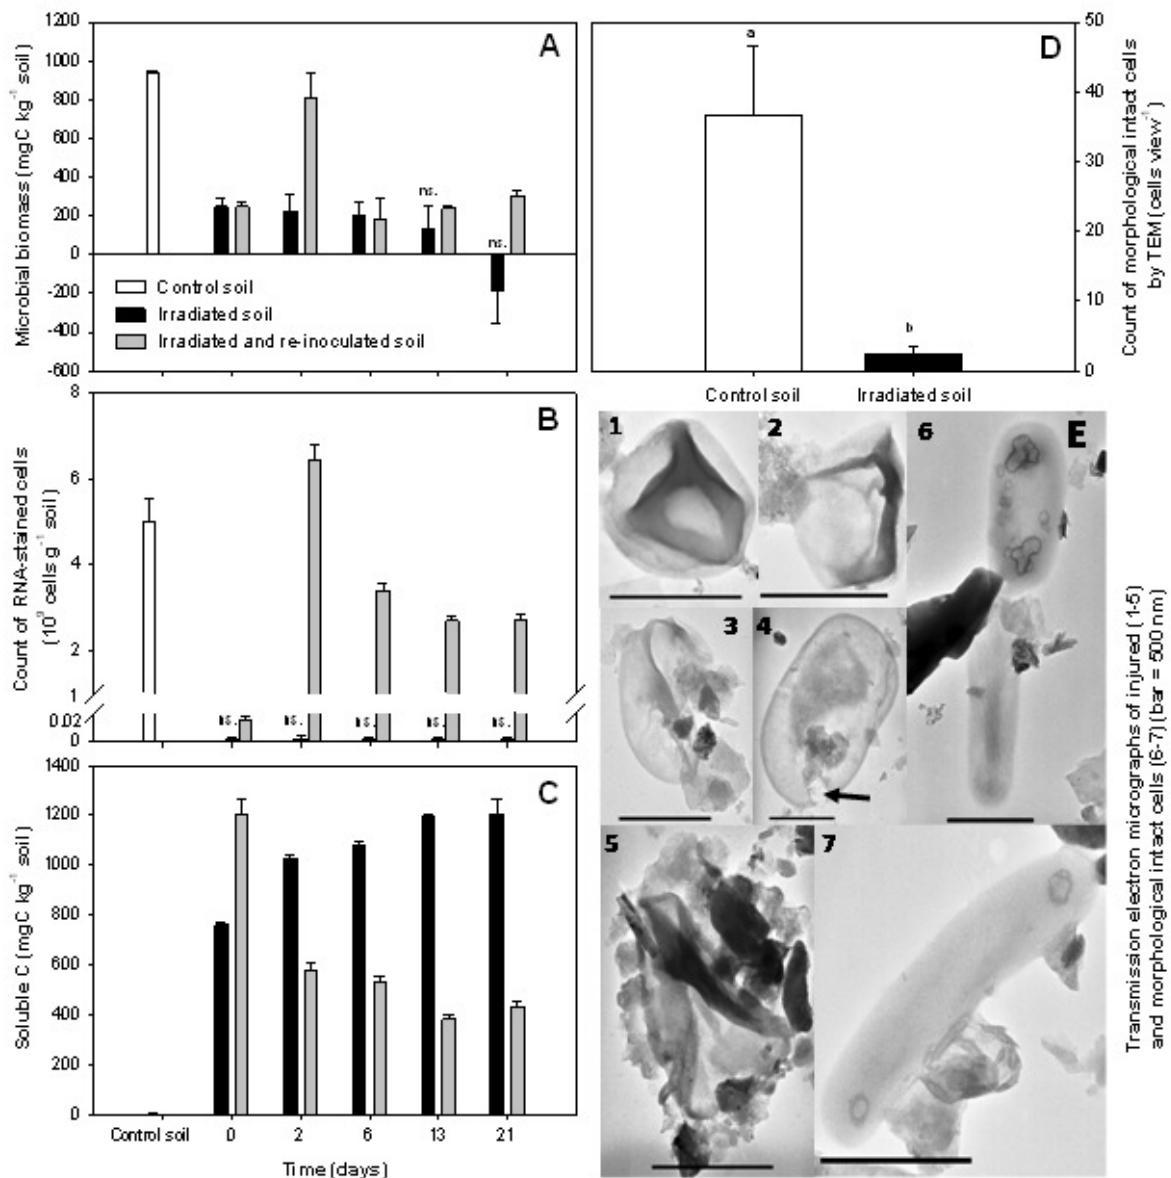

111  
 112 **Figure S1-1:** Dynamics of (A) microbial biomass, (B) RNA-stained cells and (C) Soluble C  
 113 in irradiated-soil, irradiated-and-re-inoculated-soil from Theix incubated during 21 days. The  
 114 non-irradiated soil at day 0 was used as control. Differences from zero of different variables  
 115 were tested with t-test at 5% *P*-level. ns: non significant. (D) Count of morphological intact  
 116 cells by transmission electron microscopy in irradiated and control (non-irradiated) soil from  
 117 Theix. Differences between control and irradiated soil were tested with t-tests at 5% *P*-  
 118 level. Number of cells in the irradiated-soil was not significantly different from zero (t-test, 5% *P*-  
 119 level). (E) Transmission electron micrographs of injured (graphs 1 to 5) and morphological  
 120 intact cells (graphs 6 to 7). The arrow on graph 4 indicates a membrane disruption. The scale  
 121 black bar corresponds to 500 nm length.  
 122

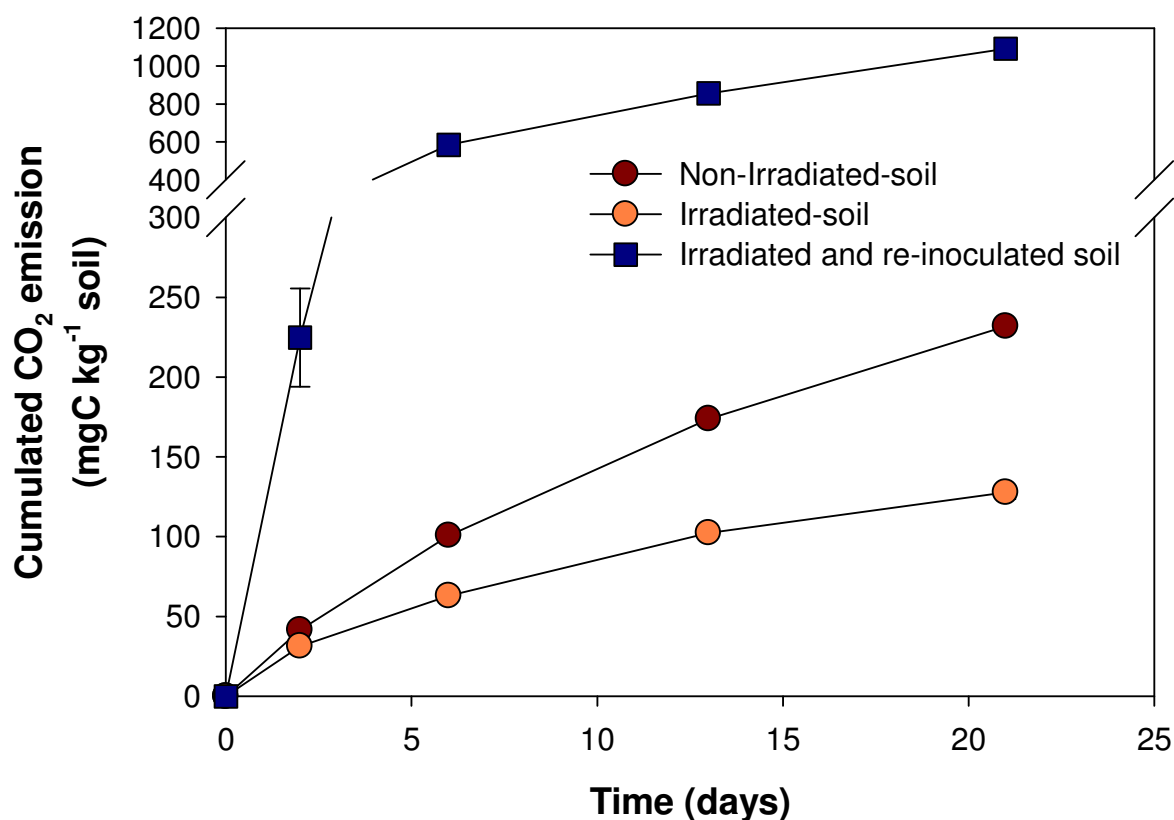

123

124 **Figure S1-2:** Cumulated CO<sub>2</sub> emission from non-irradiated-soil, irradiated-soil, irradiated-  
 125 and-re-inoculated-soil incubated during 21 days.

126

127

128 **B. COMPLEMENTARY INVESTIGATIONS**

129

130 **Soil incubation experiment.** The absence of living micro-organisms in the five studied soils  
 131 was verified after irradiation (45Gy) and at the end of incubation (21 days). This verification  
 132 has been carried out through cultural method using three media. No micro-organism from any  
 133 culture media was detected indicating that all soil microcosms were maintained under sterile  
 134 conditions (Table S1-1).

135

136 **Table S1-1:** Counting of  $\gamma$ -resistant cultivable microbes in five studied soils after exposition  
 137 to  $\gamma$ -irradiation (45kGy) and 21 days of incubation.

| Counting after irradiation | Soil names |            |      |              |       |
|----------------------------|------------|------------|------|--------------|-------|
|                            | Theix      | Laqueuille | Soro | Ponta Grossa | Bugac |
| Cultivable bacteria        | 0          | 0          | 0    | 0            | 0     |
| Cultivable fungi           | 0          | 0          | 0    | 0            | 0     |
| <i>D. radiodurans</i>      | 0          | 0          | 0    | 0            | 0     |

**Counting after 21 days of incubation**

|                       |   |   |   |   |   |
|-----------------------|---|---|---|---|---|
| Cultivable bacteria   | 0 | 0 | 0 | 0 | 0 |
| Cultivable fungi      | 0 | 0 | 0 | 0 | 0 |
| <i>D. radiodurans</i> | 0 | 0 | 0 | 0 | 0 |

138

139 **Yeast-extract incubation.** Filtered (0.022  $\mu\text{m}$ ) yeast-extract was observed by  
140 fluorescent microscopy (x 630, cells were stained by DAPI) to check the absence of cells. The  
141 irradiated-soil from Theix used in this experiment was the same that was used for conducting  
142 the in-depth investigations on sterility presented in the above section “Main investigation”.  
143 The absence of contamination during the yeast-extract experiment was verified at days 13 and  
144 53 of the incubation. To this end, aliquots of liquid were sampled in water+glucose+yeast-  
145 extract treatment (W+G+YE) and were analyzed by TSA-FISH.

146 Microscopic observations of filtered yeast-extract confirmed the absence of cells. It  
147 was interesting to note the presence of clusters of cellular debris like pieces of membrane. No  
148 RNA-producing cells were detected by TSA-FISH confirming that microcosms were  
149 maintained under sterile conditions throughout the incubation period (Table S1-2).

150

151 **Table S1-2:** Counting of RNA-stained cells in W+G+YE treatment by TSA-FISH method  
152 after 13 and 53 days of incubation.

153

| Incubation day | Count of RNA-stained cells |
|----------------|----------------------------|
| 13             | 0                          |
| 53             | 0                          |

154

155 **C. METHODS**

156

157 **Microbial biomass.** Microbial biomass was determined by the fumigation-extraction  
158 technique (Vance et al., 1987).

159 **Transmission electron microscopy.** Cells were extracted from soils as recommended by  
160 Danovaro *et al.* (2001) with some modifications as described below. An aliquot of 0.1g soil  
161 was diluted in 5 ml of sodium pyrophosphate buffer (PPI, 0.01 M). Solution was shaken for  
162 30 min and sonicated three times for 1 min each in a water bath (Bioblock Scientific 88156,  
163 320W). Larger particles were removed by centrifugation at 2000 x g for 1 min and cells  
164 contained in the supernatant were fixed with glutaraldehyde (1 % final concentration).

165 Cells were harvested by centrifuging 200 $\mu\text{l}$  of soil extract with 6 ml of sterile water at  
166 35 000 x g for 20 min onto 400 mesh Cu grids (Pelanne Instruments, Toulouse, France). Cells  
167 were then stained for 30 s with uranyl acetate (2% wt/wt). Microscopic observations and

168 enumeration of morphological intact cells were performed at a magnification of 30,000 to  
169 40,000 x using the JEM 1200 EX TEM (JEOL) operated at 80 kV.

170 **Cultivable microorganisms.** Gamma-resistant cultivable microorganisms were counted on  
171 three different mediums: i) malt medium (10g L<sup>-1</sup> Malt extract, 14g L<sup>-1</sup> Agar) for fungi; ii)  
172 lysogeny broth medium (25 gLB L<sup>-1</sup> Broth) for bacteria; iii) TGY medium (10g L<sup>-1</sup> Tryptone,  
173 1g L<sup>-1</sup> Glucose, 5g L<sup>-1</sup> baker Yeast) for *Deinococcus radiodurans*. Isolation plates were  
174 prepared by transferring a small amount of soil ( $\pm$ 250mg) into a sterilized Petri dish (Warcup,  
175 1950). Ten repetitions per treatment and soil combination were incubated for one month.

176 **TSA-FISH.** Functional RNA-producing microorganisms were enumerated using fluorescence  
177 *in-situ* hybridization combined to tyramide signal amplification (TSA-FISH). One gram soil  
178 sample was extracted in 100 mL of sodium pyrophosphate buffer (PPI, 0.01M) according to  
179 protocol described in Battin *et al.* (2001). TSA-FISH was performed as described in Biegala  
180 *et al.* (2003) and Mary *et al.* (2006) with some modifications as described below. Soil extract  
181 sample was fixed with 1% formaldehyde and harvested on 0.2 $\mu$ m (pore-size) polycarbonate  
182 filters. Filters were cut in three parts forming pseudo-replications for each sample. They were  
183 then dehydrated in ethanol series (50, 80, 100%, 3 min each) and dried. Before hybridization,  
184 prokaryotic cells were partially lysed by placing the filters for 1h at 37°C in 1ml of 100  $\mu$ g  
185 mL<sup>-1</sup> lysozyme (47000 U mg<sup>-1</sup>, Sigma-Aldrich). Enzymatic reaction was stopped by rinsing  
186 the filter 3 times in 5mL of sterile water for 1min. Filters were then dehydrated in a second  
187 ethanol series (50, 80, 100%, 3 min each) and dried. Hybridizations were performed with the  
188 probes EUB338 according to hybridization conditions described by Mary *et al.* (2006). Prior  
189 to the TSA reaction, cells were equilibrated in 5mL of TNT buffer at room temperature for  
190 15min. For the TSA reaction, 20 $\mu$ L of TSA mix (40% [wt/vol] dextran sulfate stock solution,  
191 mixed 1:1 with the amplification diluent of the TSA-Direct kit [NEN Life Science Products  
192 Inc., Boston, Mass.], and added [50:1] to fluorescein-tyramide [TSA-Direct kit]) was added,  
193 and the mixture was left to incubate for 30min at room temperature in the dark. The unlabeled  
194 fluorochrome was then washed out by two subsequent rinses, of 20min in 5mL of TNT buffer  
195 prewarmed at 55°C followed by one rinse of 10min in PBS buffer at room temperature.

196 The filter sections were labeled with 20 $\mu$ L of a mix of 800 $\mu$ L Citifluor, 200 $\mu$ L  
197 vectaShield and 1 $\mu$ L of DAPI (1 mg mL<sup>-1</sup>). The filter sections were inspected and cells were  
198 counted under a Leica DMIRB epifluorescence microscope equipped with excitation /  
199 emission filters 360/420 nm for DAPI and 490/515 nm for FITC.

200 **Sensitivity of the TSA-FISH.** Sensitivity of TSA-FISH method was determined in two steps.  
201 After extraction of microbial biomass from the non-irradiated-soil from Theix with 100 mL of



202 sodium pyrophosphate buffer (PPI, 0.01M), soil extract was diluted serially from  $10^{-1}$  to  $10^{-8}$ .  
203 Microbial biomass from all soil extracts was stained through TSA-FISH and number of RNA-  
204 stained cells was counted. This counting provided first estimation of cell density threshold  
205 from which TSA-FISH method was able to detect presence of living cells. However, this  
206 estimation was made on diluted living soil extracts where cell/soil-particle ratio was always  
207 identical. In contrast, irradiation caused a decrease in cell/soil-particle ratio of irradiated-soil.  
208 Therefore, we set up a second experiment in order to determine effect of soil particles on the  
209 quantification of cell density. The irradiated-soil from Theix was re-inoculated with diluted  
210 soil inoculum prepared in the previous step to obtain  $10^5$  cell  $g^{-1}$  soil. Immediately after soil  
211 inoculation, cell density in irradiated-reinoculated soil was quantified by TSA-FISH. If  
212 measured density was lower than prepared density ( $10^5$  cell  $g^{-1}$ ), then soil particles had  
213 detrimental effect on the quantification of cell density in the soil. Three replicates per  
214 treatment were made.

215         The first experiment showed that the TSA-FISH method was able to significantly  
216 detect presence of living cells from  $10^3$  cells  $mL^{-1}$  ( $10^{-7}$  level of dilution, Fig. S1-3A). This  
217 number of cells in soil extract corresponded to  $10^5$  cells  $g^{-1}$  soil. In the second experiment,  
218 measured cell density matched experimentally prepared cell density (1.6 vs 1.7  $10^5$  cells  $g^{-1}$   
219 soil, respectively; Fig S1-3B), indicating that quantification of cell density in soil was not  
220 affected by soil particles. We conclude that TSA-FISH applied to our soil was able to detect  
221  $10^5$  cells  $g^{-1}$  soil.

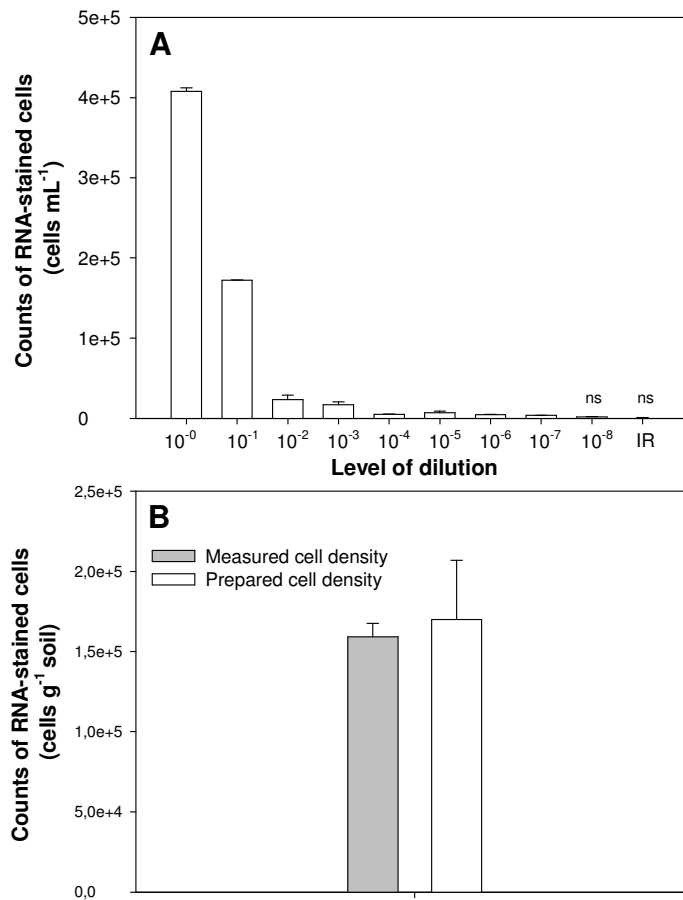

222

223 **Figure S1-3:** A) Count of RNA-stained cells in pure and diluted soil extracts and B) Prepared  
 224 vs measured cell density in the irradiated-re-inoculated-soil. Differences from zero were  
 225 tested with t-test at 5% *P*-level (ns: non significant).

226

227 **SUPPLEMENT 2: GENERALIZATION OF RESPIRATORY ENZYME STABILIZATION**  
 228 **IN THE FOUR OTHER STUDIED SOILS**

229 The incubation of three enzymes involved in glycolysis (GHK: glucose hexokinase, G6PI:  
 230 glucose-6-phosphate isomerase) and the Krebs cycle (MDH: malate dehydrogenase) in non-  
 231 irradiated-soil from Theix showed that 5-14% of initial enzymatic activity was retained in a  
 232 highly stable form. Here we tested whether the protective role of soil on respiratory enzymes  
 233 can occur in other soil types. To this end, we incubated G6PI in non-irradiated soil from four  
 234 other studied sites (Ponta Grossa, Laqueuille, Bugac and Soro) for 13 days. This enzyme was  
 235 selected because it showed the lowest stabilization rate (Table 2 of the main text). However,  
 236 spectrometric measurement of G6PI activity at pH=8.5 was not possible in soil from Soro.  
 237 This soil released huge quantity of humic acids at pH 8.5 hampering measurement of NADPH  
 238 since humic acids and NADPH both absorbs at 340 nm. To demonstrate the ability of soil  
 239 from Soro to stabilize respiratory enzymes, G6PI was replaced by MDH. MDH was measured  
 240 at pH = 6.7, which limited solubilization of humic acids and allowed measurement of NADH  
 241 concentration.

242 Activity of G6PI in the soils of Ponta Grossa, Laqueuille and Bugac decreased  
 243 strongly after one hour of incubation and then moderately till day 6 of incubation (Table S2-  
 244 1). From day 6 to the end of incubation, activity of G6PI was constant indicating that  
 245 remaining enzymes were retained in a stable pool. These results are consistent with the fast  
 246 and intermediate cycling pools of enzymes identified in the soil from Theix (Table 2 of the  
 247 main text). Percentage of enzymatic activity stabilized in soil depended on soil type and  
 248 represented 3.3% for Ponta Grossa, 0.8% for Laqueuille and 2.5% for Bugac (Table S2-1).  
 249 Activity of MDH in soil from Soro followed the same kinetics as for G6PI but it stabilized at  
 250 higher percentage ( $\pm 27\%$ ). Collectively, these results indicate that the soil stabilization of  
 251 respiratory enzymes is common in soils.

252 **Table S2-1:** Activity of glucose-6-phosphate isomerase (G6PI) and malate dehydrogenase  
 253 (MDH) after their addition in the non-irradiated-soils of Ponta Grossa, Laqueuille, Bugac and  
 254 Soro. Enzyme activity with time is expressed as % of the initial activity of enzymatic solution  
 255 applied to the soil.  
 256

| <i>Incubation time</i> | <b>G6PI</b>     |                 |                 | <b>MDH</b>     |
|------------------------|-----------------|-----------------|-----------------|----------------|
|                        | Ponta Grossa    | Laqueuille      | Bugac           | Soro           |
| 1 hour                 | 7.85 $\pm$ 0.96 | 1.49 $\pm$ 0.18 | 10.4 $\pm$ 0.2  | 42.4 $\pm$ 6.2 |
| 6 days                 | 3.51 $\pm$ 0.36 | 0.81 $\pm$ 0.06 | 2.31 $\pm$ 0.36 | 28.2 $\pm$ 2.4 |
| 13 days                | 3.32 $\pm$ 0.07 | 0.76 $\pm$ 0.05 | 2.52 $\pm$ 0.16 | 26.9 $\pm$ 1.8 |

257

258 **SUPPLEMENT 3: KINETIC ACTIVITY OF G6PI IN THE IRRADIATED-SOIL FROM**  
259 **THEIX.**

260  
261  
262

263 **Figure S3-1:** Activity of glucose-6-phosphate isomerase (G6PI) following its addition in the  
264 irradiated-soil from Theix. Enzyme activity with time is expressed as % of the initial activity  
265 of enzymatic solution applied to the soil.

266  
267  
268  
269  
270  
271  
272  
273  
274  
275

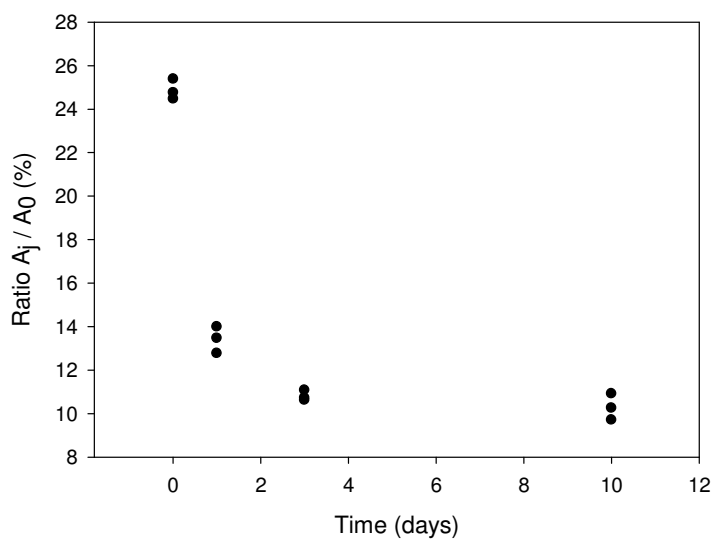

276 **SUPPLEMENT 4: UNLABELED AND LABELED CARBON RELEASED AS CO<sub>2</sub> IN**  
277 **WATER AND SOIL MICROCOSMS.**

278  
279 The <sup>13</sup>C labeling of glucose allowed separating mineralization of added glucose from that of  
280 unlabelled substrates present in yeast extract and soil. Fig S4-1 shows that labeled glucose (G)  
281 was oxidized in CO<sub>2</sub> in water (W) and soil (S) microcosms with yeast extract (YE)  
282 (W+G+YE and S+G+YE treatments, respectively). Moreover, labeled CO<sub>2</sub> emission was  
283 greater in S+G+YE than in S+G treatment. These results indicate that an equivalent of  
284 glycolysis and the Krebs cycle was reconstituted by enzymes released from dead yeast cells in  
285 water and soil. It is interesting to note that emitted CO<sub>2</sub> was equally composed of labeled and  
286 unlabelled carbon in water microcosms whereas it was dominated by unlabelled carbon in soil  
287 microcosms. This dominance of unlabelled CO<sub>2</sub> in soil microcosms probably reflected  
288 dominance of unlabelled substrates over labeled glucose since irradiation released huge  
289 quantities of soluble C from killed biomass (Fig. S1-1C). Moreover, these unlabelled  
290 substrates released from killed biomass contained many intermediary compounds that could  
291 be decarboxylated faster than glucose. These intermediary compounds may also inhibit  
292 glucose oxidation since many enzymatic reactions involved in glycolysis and the Krebs cycle  
293 are inhibited by presence of reaction  
294 products.

295  
296 **Figure S4-1:** Cumulated emissions of  
297 (A) unlabelled CO<sub>2</sub> and (B) labelled  
298 CO<sub>2</sub> from water and soil microcosms.  
299 Symbols are labeled as follows: **S**,  
300 irradiated-soil; **S+G**, irradiated-soil +  
301 labeled glucose; **S+G+YE**, irradiated-  
302 soil + labeled glucose + yeast extract;  
303 **W+G+YE**, water + labeled glucose +  
304 yeast extract.

305

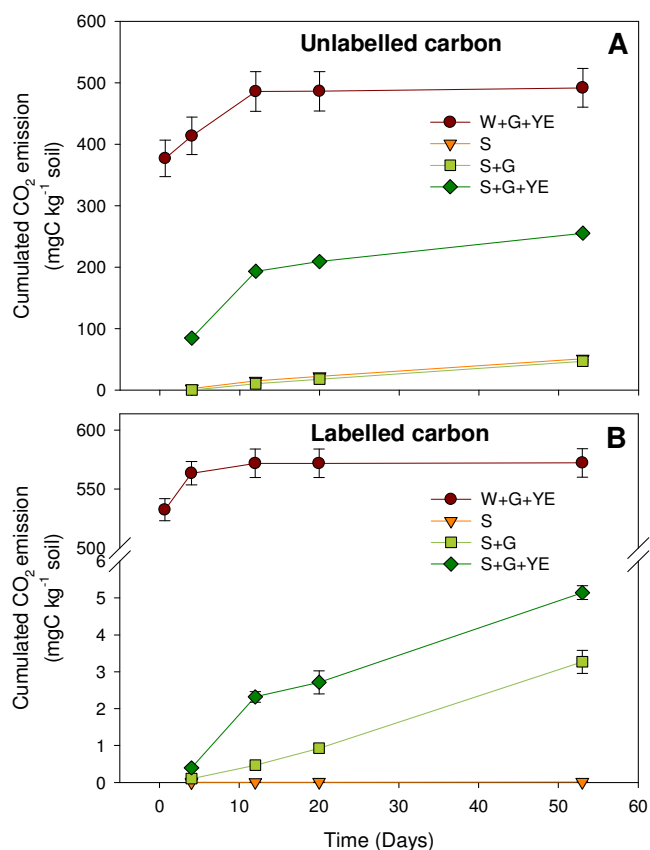

306 **SUPPLEMENT 5: EFFECT OF THE SECOND GLUCOSE DOSE ON MICROCOSM**  
307 **RESPIRATION.**

308 To determine the long-term (>20 days) metabolic capabilities of enzymes from yeast-extract  
309 in water and soil (W+G+YE and S+G+YE treatments), two sets of microcosms were  
310 prepared. First set received glucose application at the beginning of experiment (results from  
311 this set are presented in the main text of manuscript) whereas second set received glucose  
312 after 20 days of incubation. Emission of CO<sub>2</sub> from the two sets of microcosms were similar  
313 (Fig S5-1) indicating that respiratory activity in microcosms after 20 days was limited by  
314 activity of yeast-extract enzymes and not by availability of C-substrate. The higher respiratory  
315 activity in S+G+YE than in W+G+YE treatment illustrated the role of soil particles in the  
316 stabilization of enzymes and the EXOMET.

317

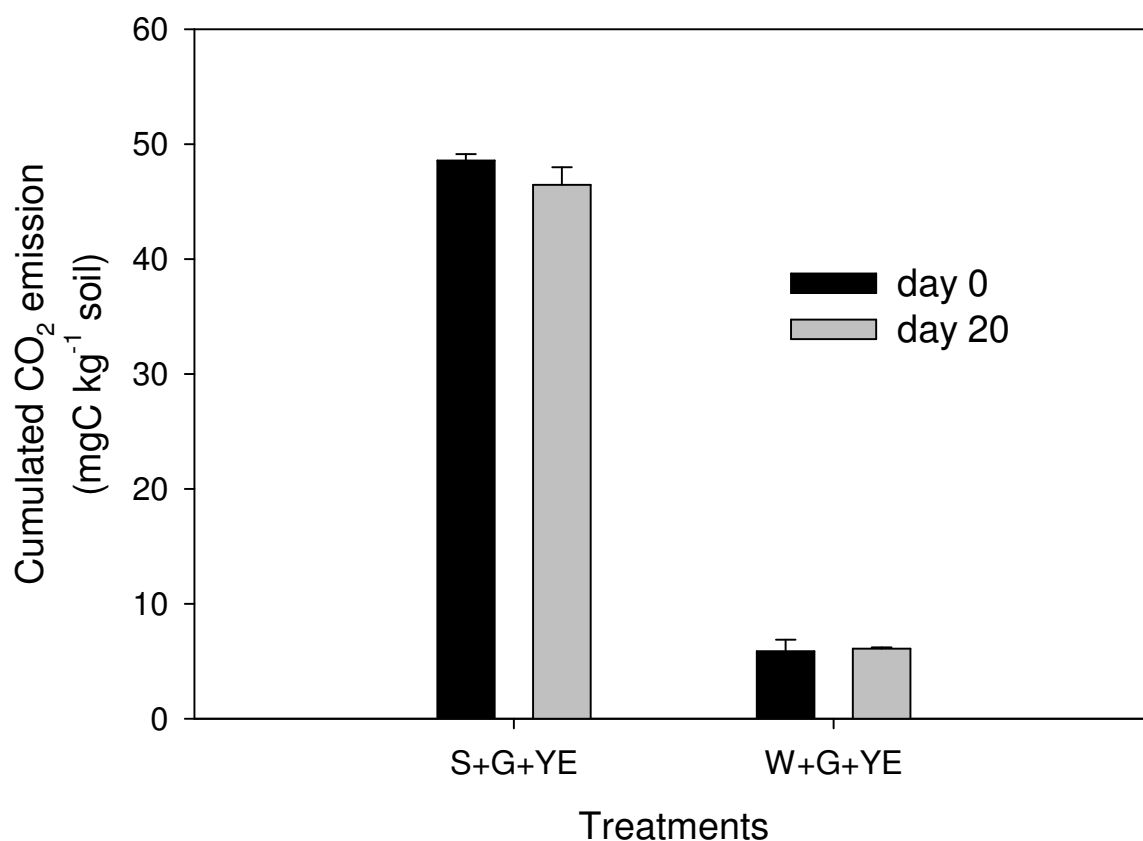

318

319 **Figure S5-1:** Cumulated CO<sub>2</sub> emissions from water and soil microcosms that received the  
320 glucose supply at the beginning or after 20 days of incubation. The cumulated emissions  
321 corresponded to the incubation period 20-58 days.

322

323 **REFERENCES**

- 324 Battin, T. J., Wille, A., Sattler, B., and Psenner, R.: Phylogenetic and functional heterogeneity  
325 of sediment biofilms along environmental gradients in a glacial stream, *Appl. Environ.*  
326 *Microbiol.*, 67, 799-807, 2001.
- 327 Biegala, I. C., Not, F., Vaultot, D. & Simon, N. Quantitative assessment of pico-eukaryotes in  
328 the natural environment by using Taxon-specific oligonucleotide probes in association  
329 with tyramide signal amplification-fluorescence, in situ hybridization and flow  
330 cytometry. *Appl. Environ. Microbiol.* **69**, 5519-5529 (2003).
- 331 Danovaro, R., Dell'Anno, A., Trucco, A., Serresi, M., and Vanucci, S.: Determination of virus  
332 abundance in marine sediments, *Appl. Environ. Microbiol.*, 67, 1384-1387,  
333 10.1128/aem.67.3.1384-1387.2001, 2001.
- 334 Mary, I., Cummings, D. G., Biegala, I. C., Burkill, P. H., Archer, S. D., and Zubkov, M. V.:  
335 Seasonal dynamics of bacterioplankton community structure at a coastal station in the  
336 western English Channel, *Aquat. Microb. Ecol*, 42, 119-126, 2006.
- 337 McNamara, N. P., Black, H. I. J., Beresford, N. A., and Parekh, N. R.: Effects of acute  
338 gamma irradiation on chemical, physical and biological properties of soils, *Appl. Soil*  
339 *Ecol.*, 24, 117-132, 2003.
- 340 Vance, E. D., Brookes, P. C., and Jenkinson, D. S.: An extraction method for measuring soil  
341 microbial biomass-C, *Soil Biol. Biochem.*, 19, 703-707, 1987.
- 342 Warcup, J. H.: The soil plate method for isolation of fungi from soil, *Nature*, 166, 117-117,  
343 1950.
